# Supplementary material for: Functional analysis of Na+/H+ exchanger 9 variants identified in patients with autism and epilepsy
Source: PubMed Central journal article supplement — Matters (Zur). Author manuscript; Available in PMC 2017 Aug 14. (PMC5555647; doi:10.19185/matters.201704000009), 2017-05-22
Supplement: NIHMS887306-supplement-Supplemental_Table_1.pdf [file NIHMS887306-supplement-Supplemental_Table_1.pdf]

| Amino acid comparison                                                                       |                                                   |                                        |                                                |                                     |                                   |                                    |
|---------------------------------------------------------------------------------------------|---------------------------------------------------|----------------------------------------|------------------------------------------------|-------------------------------------|-----------------------------------|------------------------------------|
| Substitution                                                                                | P117T                                             |                                        | D496N                                          |                                     | Q609K                             |                                    |
| Amino acid change                                                                           | Proline                                           | Threonine                              | Aspartic acid                                  | Asparagine                          | Glutamine                         | Lysine                             |
| Polarity/charge                                                                             | Non-polar                                         | Polar                                  | Negatively charged                             | Polar                               | Polar                             | Positively charged                 |
| pH                                                                                          | Neutral                                           | Neutral                                | Acidic                                         | Neutral                             | Neutral                           | Basic                              |
| Residue weight                                                                              | 97                                                | 101                                    | 115                                            | 114                                 | 128                               | 128                                |
| Hydrophobicity score                                                                        | -1.6                                              | -0.7                                   | -3.5                                           | -3.5                                | -3.5                              | -3.9                               |
| Hydrophilicity score                                                                        | 0.0                                               | -0.4                                   | 3.0                                            | 0.2                                 | 0.2                               | 3.0                                |
| Secondary structure propensity                                                              | Strong $\alpha$ breaker<br>Strong $\beta$ breaker | $\alpha$ indifferent<br>$\beta$ former | Weak $\alpha$ former<br>Strong $\beta$ breaker | $\alpha$ breaker<br>$\beta$ breaker | $\alpha$ former<br>$\beta$ former | $\alpha$ former<br>$\beta$ breaker |
| Grantham difference*                                                                        | 38                                                |                                        | 23                                             |                                     | 53                                |                                    |
| SIFT prediction                                                                             | Tolerated                                         |                                        | Damaging                                       |                                     | Tolerated                         |                                    |
| PolyPhen prediction                                                                         | Benign                                            |                                        | Benign                                         |                                     | Benign                            |                                    |
| LRT prediction                                                                              | Neutral                                           |                                        | Neutral                                        |                                     | Neutral                           |                                    |
| MutationTaster prediction                                                                   | Polymorphism                                      |                                        | Disease causing                                |                                     | Polymorphism                      |                                    |
| MutationAssessor prediction                                                                 | Neutral                                           |                                        | Medium impact                                  |                                     | Neutral                           |                                    |
| FATHMM prediction<br>(A score of less than -1.5 predicts damaging)                          | -1.05                                             |                                        | 0.39                                           |                                     | 0.6                               |                                    |
| PhyloP conservation score<br>(The larger the score, the more conserved the site, max 2.941) | 2.832                                             |                                        | 2.643                                          |                                     | 1.324                             |                                    |
| GERP conservation score<br>(The larger the score, the more conserved the site, max 6.17)    | 4.2                                               |                                        | 5.11                                           |                                     | 2.63                              |                                    |
| Consurf conservation score<br>(The larger the score, the more conserved the site, max 9)    | 4                                                 |                                        | 6                                              |                                     | 1                                 |                                    |
| dbSNP                                                                                       | rs186296463                                       |                                        | rs111291437                                    |                                     | -                                 |                                    |

**Supplemental table 1:** The physiochemical and functional consequences of autism associated NHE9 substitutions determined as described in the Methods. \*The higher the Grantham difference score, the less tolerated the amino acid substitution. Highest score is 215 for Trp-Cys and lowest is 5 for Leu-Ile substitution.
